# Supplementary material for: Thermal and Mechanical Properties of Esterified Lignin in Various Polymer Blends
Source: MDPI journal article supplement (doi:10.3390/molecules26113219), 2021-05-27
Supplement: s1 [file s1]

Electronic Supporting Information

# Thermal and mechanical properties of esterified lignin in various polymer blends

Alexander Orebom<sup>a</sup>, Davide Di Francesco<sup>b</sup>, Patrick Shakari<sup>c</sup>, Joseph Samec<sup>a,b</sup> and Clara Pierrou<sup>\*,a</sup>

<sup>a</sup> RenFuel K2B Materials AB, Rapskatan 25, 75450 Uppsala (Sweden)

<sup>b</sup> Department of Organic Chemistry, Arrhenius Laboratory, Stockholm University, Svante Arrhenius väg 16C, 106 91 Stockholm (Sweden)

<sup>c</sup> Department of Polymer Chemistry, Ångström laboratory, Uppsala University, Lägerhyddsvägen 1, 751 21 Uppsala (Sweden)

### Thermogravimetric analysis

Thermogravimetric analysis (TGA) was performed on a Mettler TGA/DSC1 system using a temperature programme from 50°C to 600°C (heating rate: 10°C min<sup>-1</sup>) in nitrogen atmosphere (flow rate: 80 mL min<sup>-1</sup>). The samples were held at constant temperature in 5 min, followed by an air flow of 80 mL min<sup>-1</sup> at 600°C for 10 minutes. Sample size 5 mg.

^exo

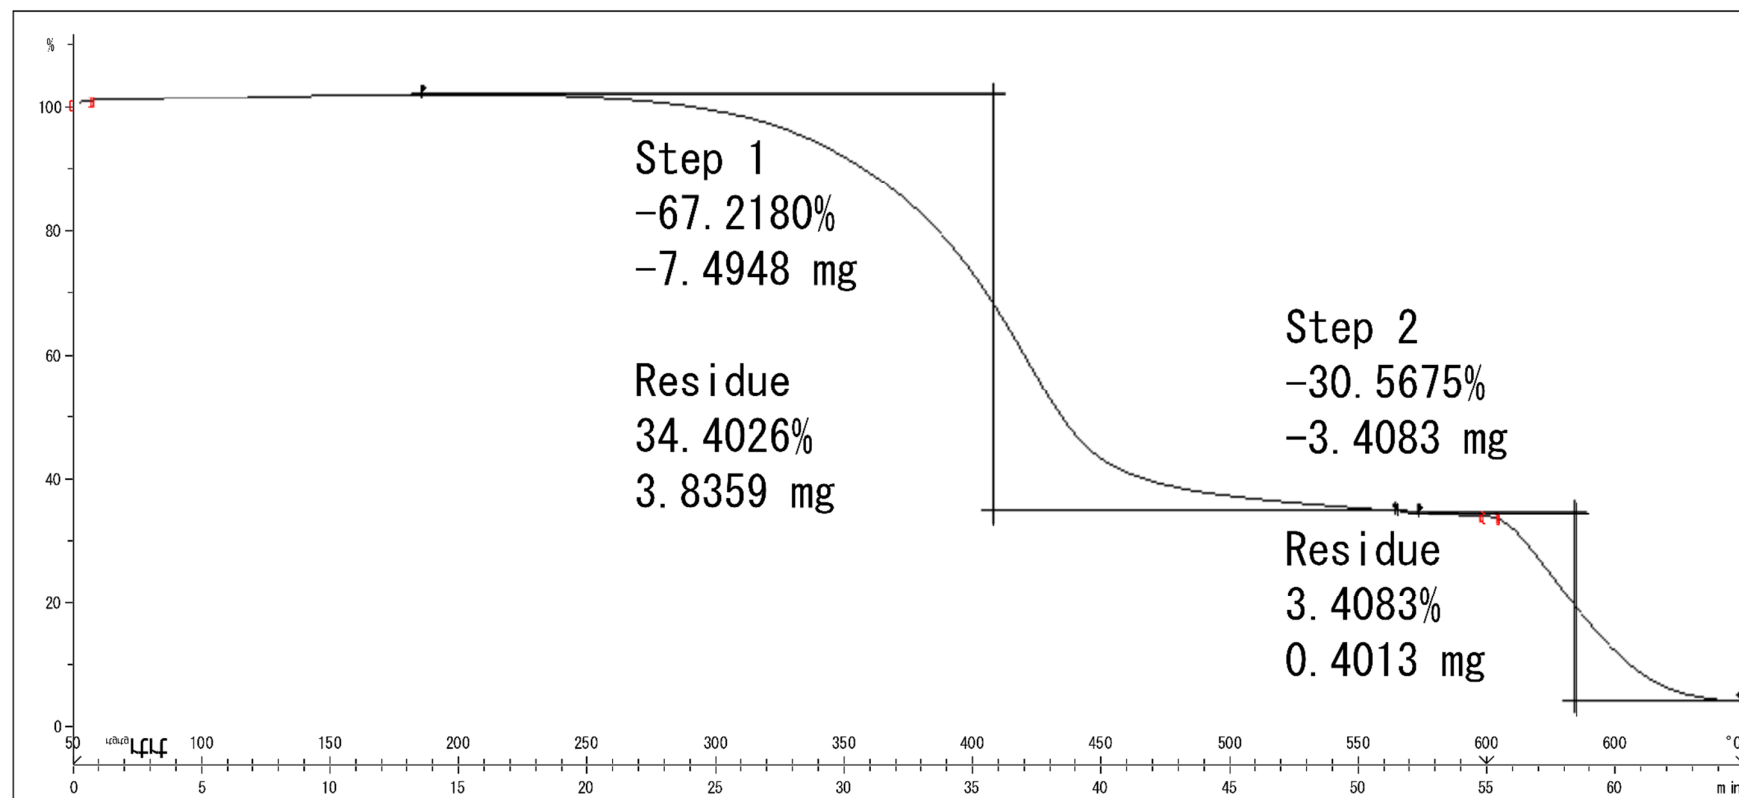

Figure S1 TGA curve for pure lignin ester.

## Differential scanning calorimetry

Differential scanning calorimetry (DSC) for the blends was performed on a DSC Q2000 system using a heat/cool/heat programme from -25°C to 200°C (heating rate: 10°C min<sup>-1</sup>, cooling rate: 5°C min<sup>-1</sup>). DSC for pure lignin ester was performed on a Mettler DSC1 system using a heating programme from 25°C to 175°C (heating rate: 10°C min<sup>-1</sup>) in nitrogen atmosphere (flow rate: 80 mL min<sup>-1</sup>). Sample size 5 mg.

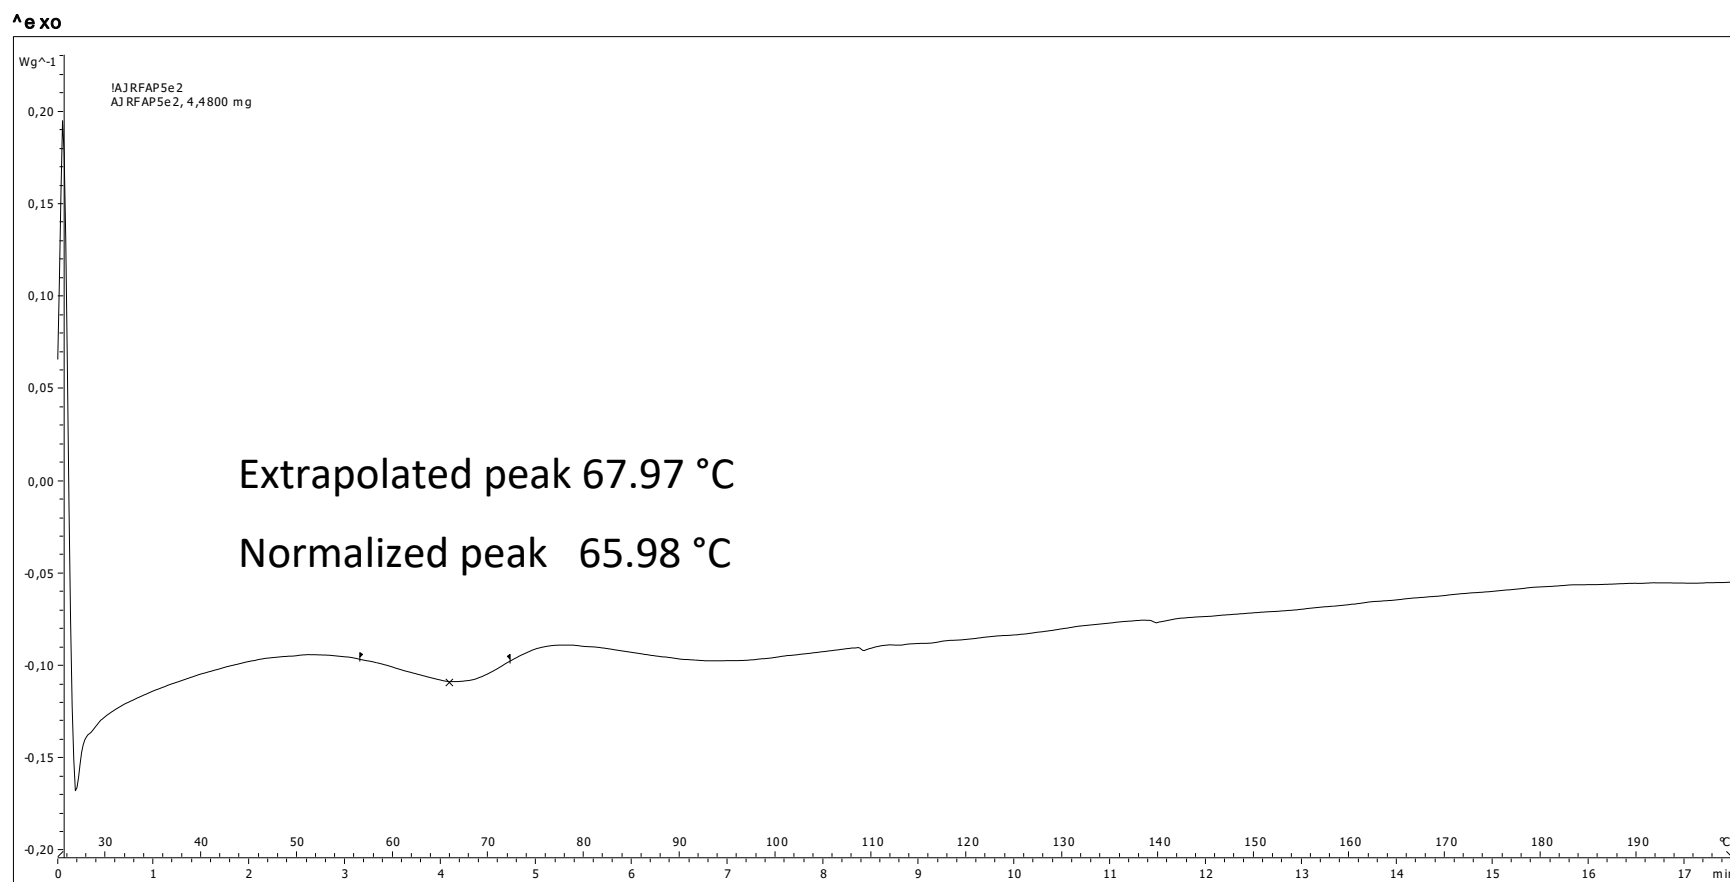

Figure S2 DSC curve for pure lignin ester.

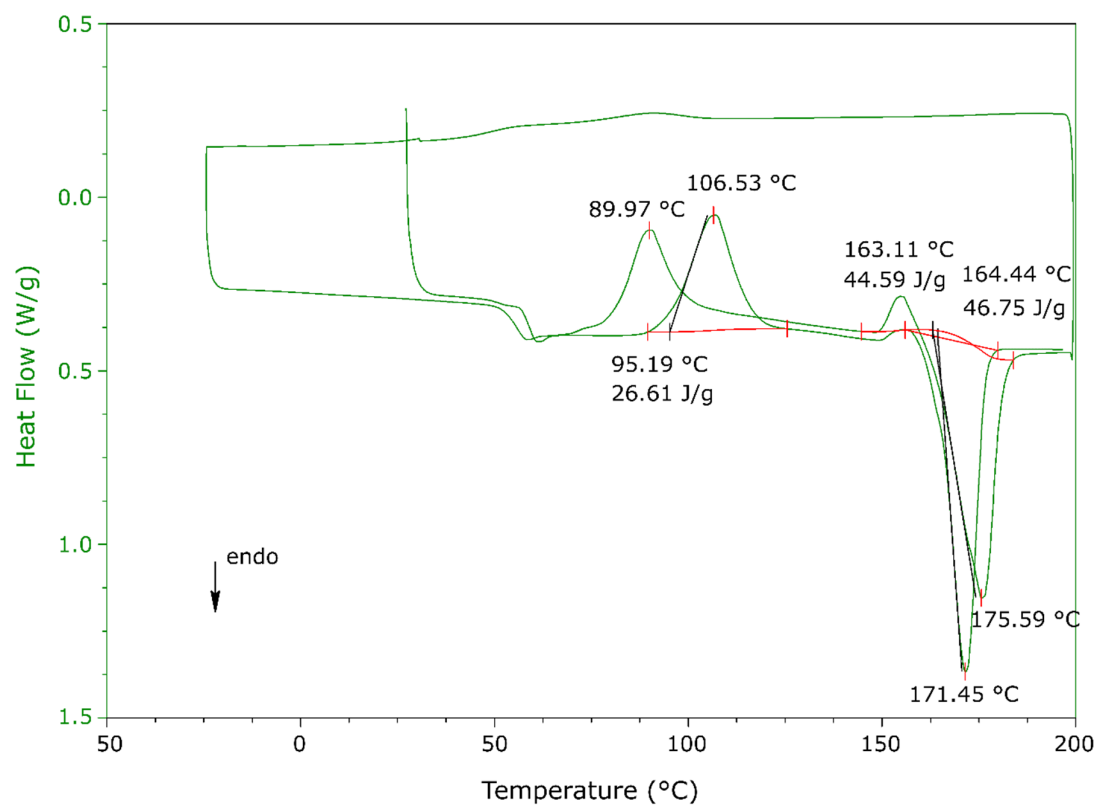

Figure S3 DSC curve for PLA – lignin ester using heat/cool/heat programme from -25°C to 200°C (heating rate: 10°C min<sup>-1</sup>, cooling rate: 5°C min<sup>-1</sup>).

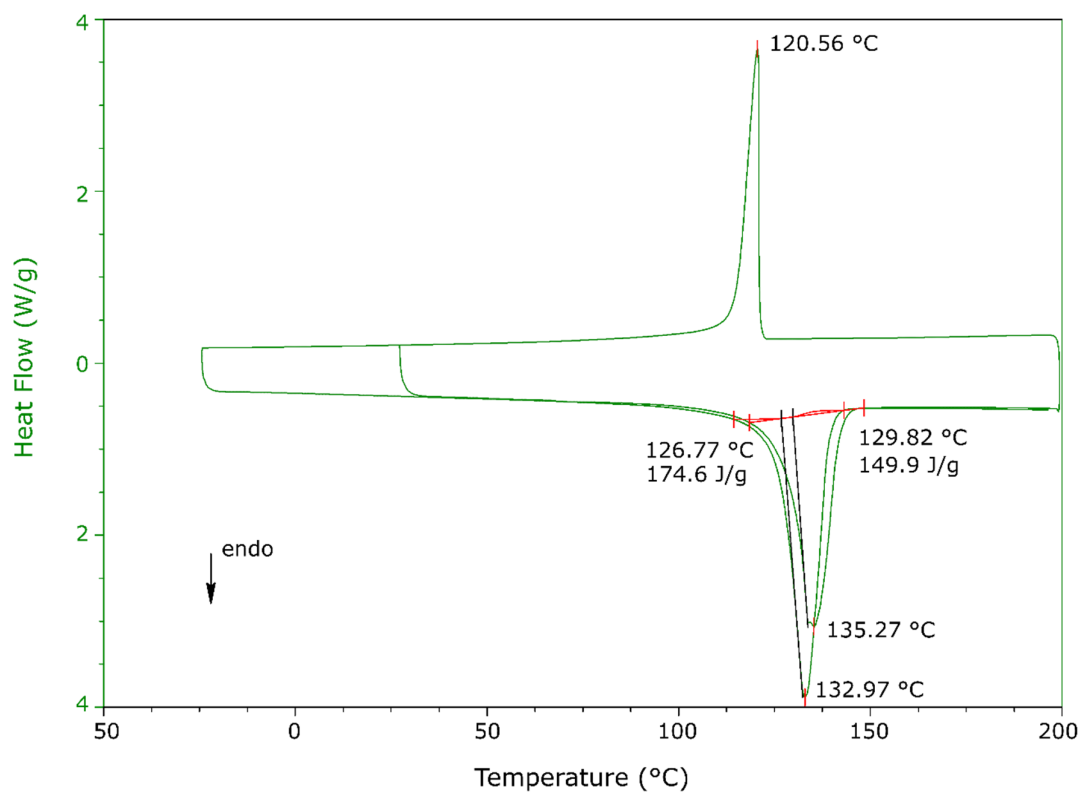

Figure S4 DSC curve for HDPE – lignin ester using heat/cool/heat programme from -25°C to 200°C (heating rate: 10°C min<sup>-1</sup>, cooling rate: 5°C min<sup>-1</sup>)

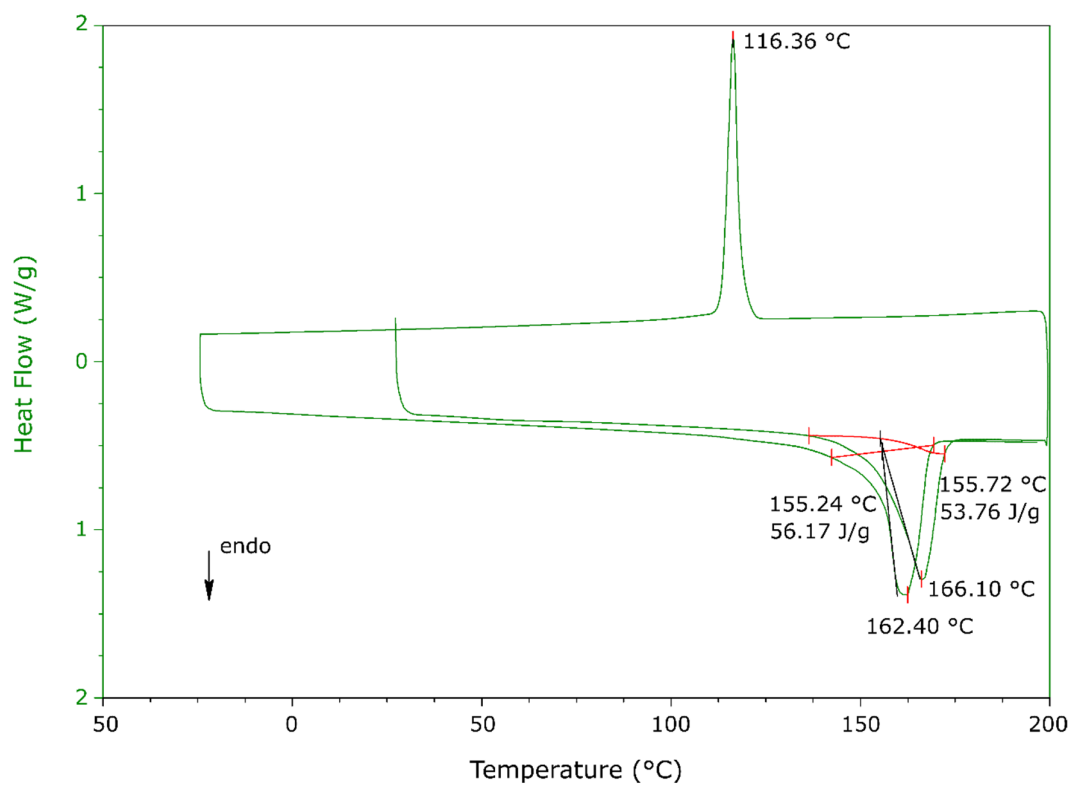

Figure S5 DSC curve for PP – lignin ester using heat/cool/heat programme from -25°C to 200°C (heating rate: 10°C min<sup>-1</sup>, cooling rate: 5°C min<sup>-1</sup>).

## FT-IR

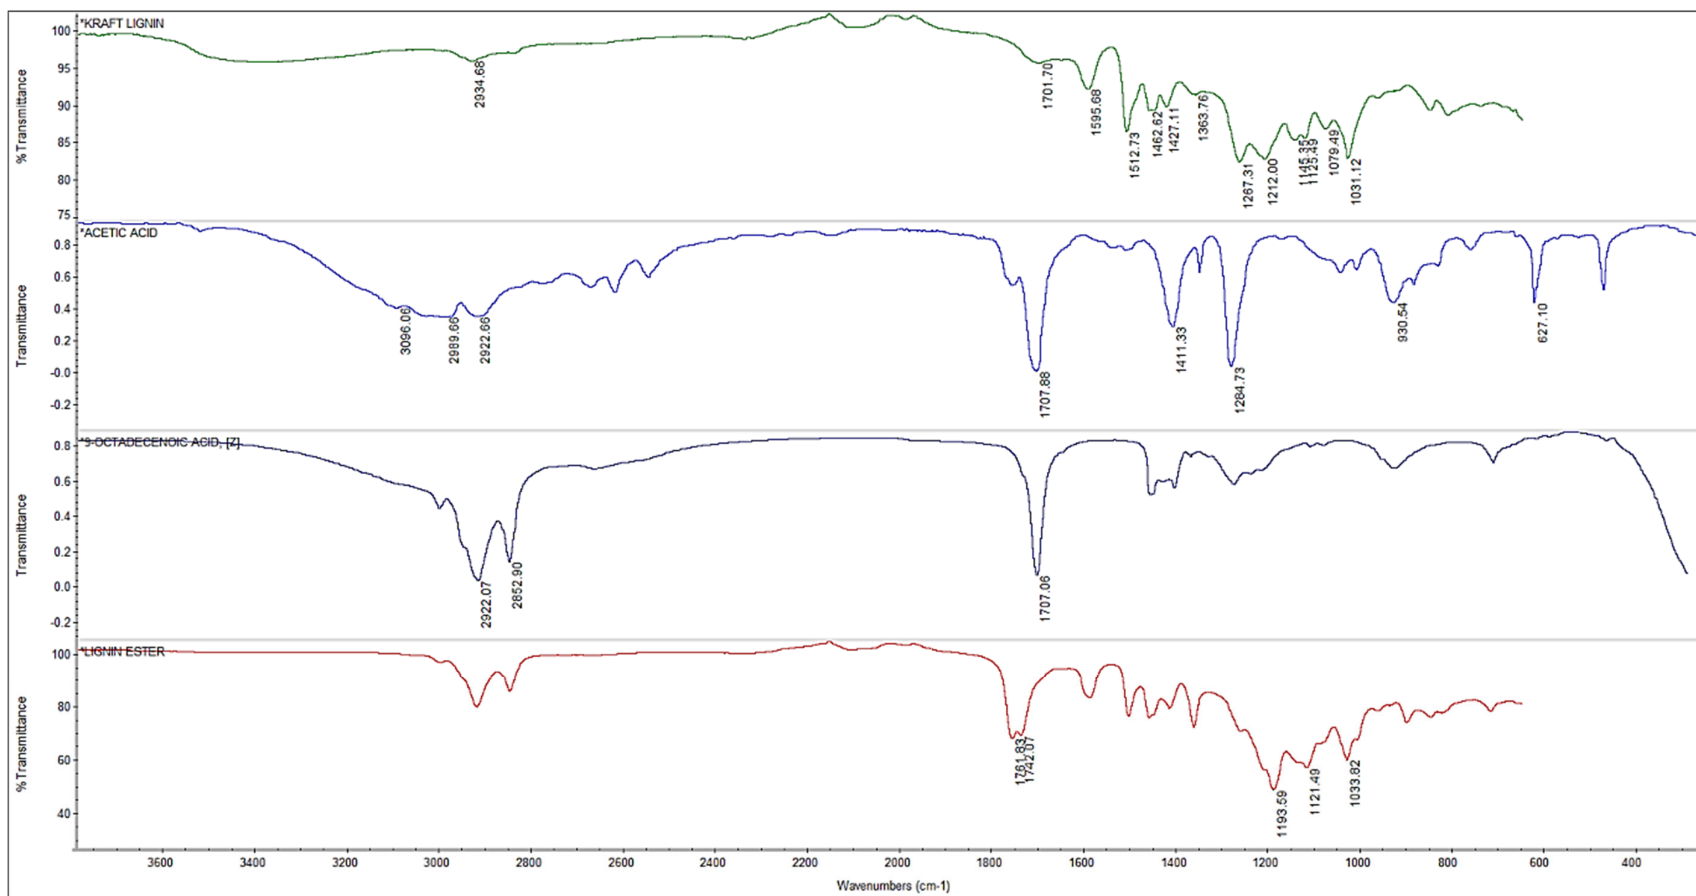

Figure S6 FT-IR spectra of (from top to bottom) kraft lignin, acetic acid, oleic acid, and lignin ester.

## NMR

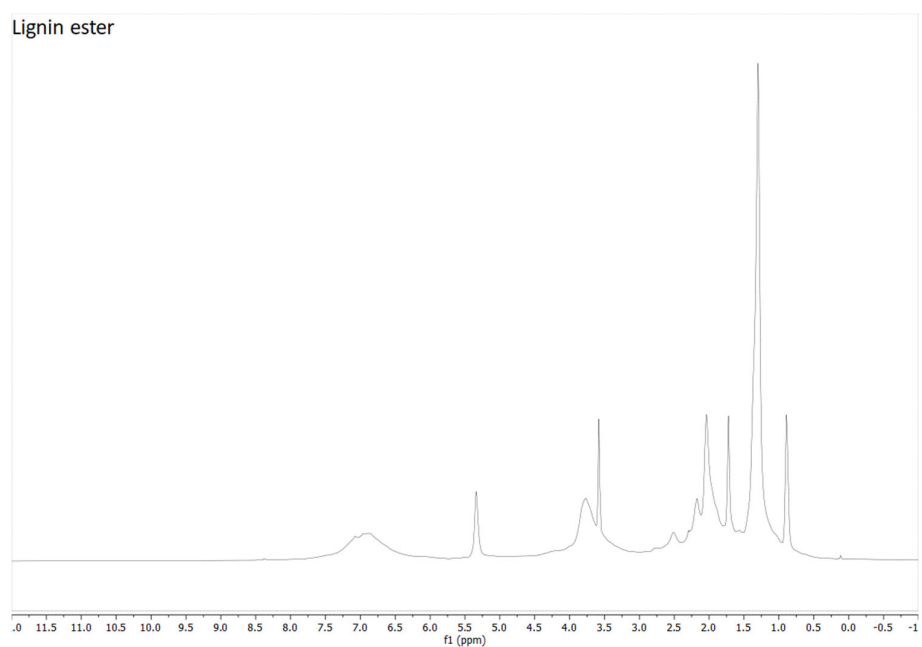

Figure S7  $^1\text{H}$  NMR spectrum of lignin ester in  $d_8$ -THF.

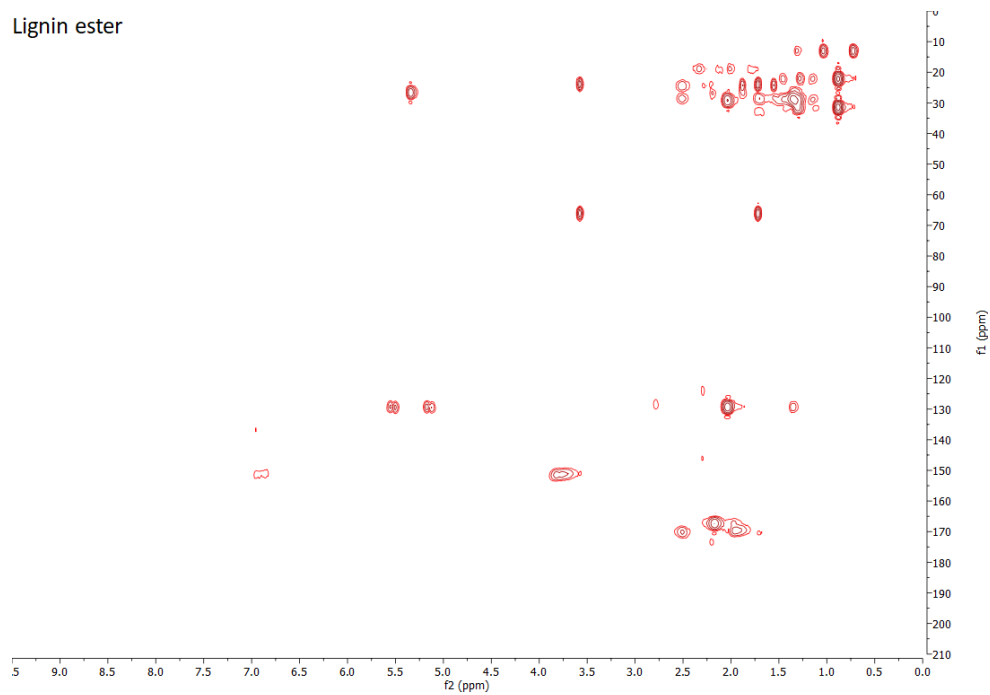

Figure S8 HMBC spectrum of lignin ester in  $d_8$ -THF.

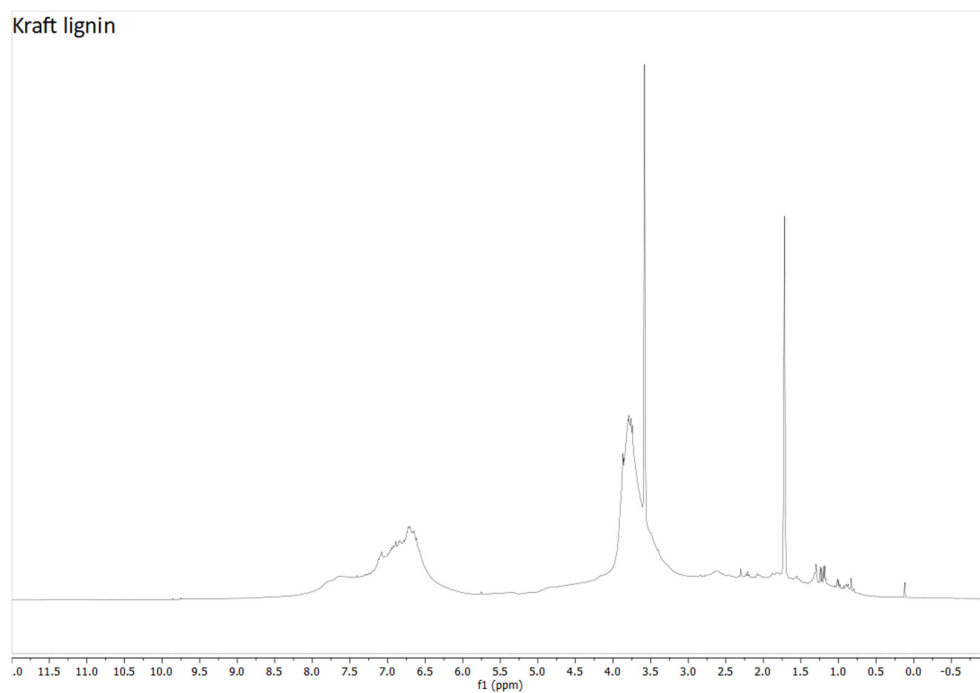

Figure S9  $^1\text{H}$  NMR spectrum of Kraft lignin in  $d_8$ -THF.

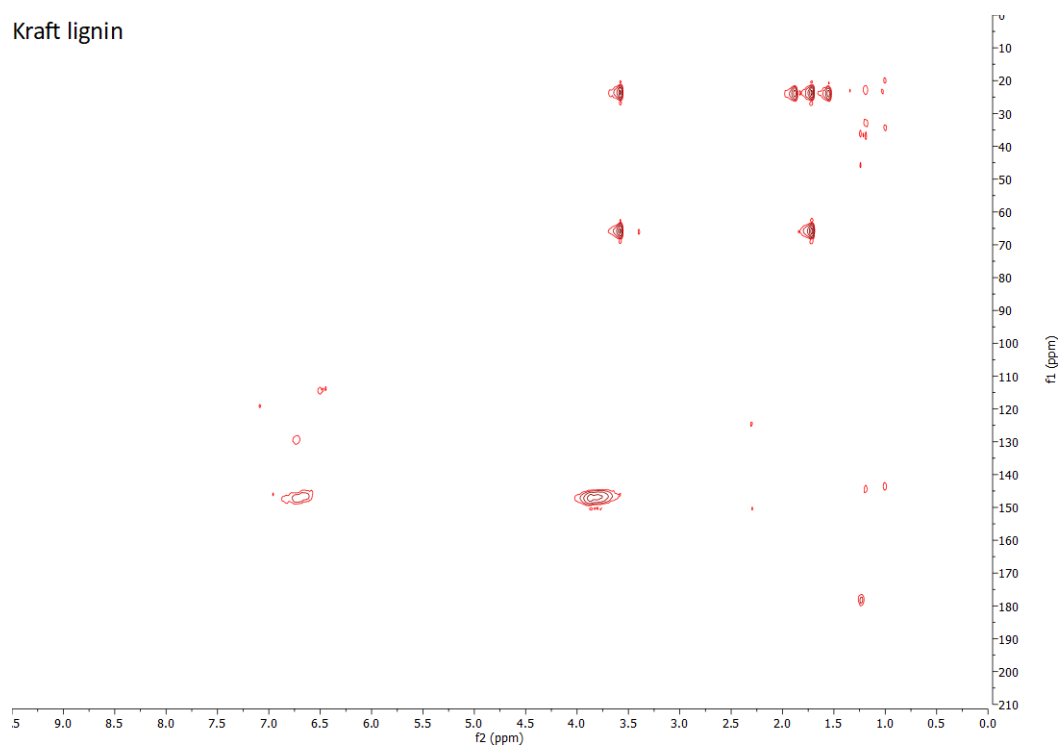

Figure S10 HMBC spectrum of Kraft lignin in  $d_8$ -THF.



## GPC

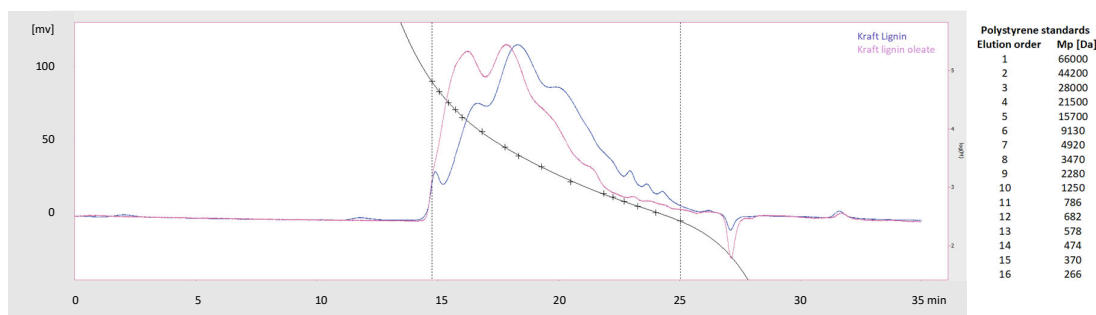

Figure S11 GPC chromatogram of lignin ester (pink) and kraft lignin (blue).

## Mechanical properties

Polymer blends of lignin esters in PP, HDPE and PLA were prepared using a Coperion twin screw compounder to mix blends with a 20% lignin ester to plastic proportion and pure samples of PP, HDPE and PLA as a reference material at 180°C. The obtained extrudates were cut using a granulator into pieces followed by injection moulding of the pellets into dumbbell shaped samples using an Engel injection moulder at 185°C with reference to ISO 527-2 specifications. The dumbbell samples were used to determine the tensile properties of each lignin ester sample compared to the reference, respectively. Tensile tests were performed using a MTS20/M system according to ISO 527-2 (1 mm min<sup>-1</sup> /50 mm min<sup>-1</sup>), and impact strength tests were performed using an Instron CEAST 9050 instrument according to ISO 179 type A using a 0.5 J hammer with sample sizes of 3.94x8x8 mm.

Table S1 Numerical values for mechanical properties of the various blends.

| Tensile properties                | Method    | Unit              | HDPE – LE |     | PP – LE |     | PLA – LE |     |
|-----------------------------------|-----------|-------------------|-----------|-----|---------|-----|----------|-----|
|                                   |           |                   | Value     | δ   | Value   | δ   | Value    | δ   |
| Young's modulus                   | ISO 527-2 | MPa               | 1260      | 18  | 1637    | 35  | 3248     | 31  |
| Stress at yield                   | ISO 527-2 | MPa               | 26.3      | 0.2 | 29.4    | 0.2 | 59.4     | 0.2 |
| Strain at yield                   | ISO 527-2 | %                 | 6.3       | 0.2 | 3.9     | 0.1 | 2.1      | 0.1 |
| <b>Impact resistance (+23 °C)</b> |           |                   |           |     |         |     |          |     |
| Charpy. notched.                  | ISO 179   | kJ/m <sup>2</sup> | 2.7       | 0.7 | 2.8     | 0.5 | 2.1      | 0.6 |
| Charpy. unnotched.                | ISO 179   | kJ/m <sup>2</sup> | 25.6      | 2.8 | 17.5    | 1.1 | 14.8     | 1.6 |

Value intended as mean value and δ as standard deviation.

Table S2 Numerical values for mechanical properties of the reference polymers.

| Tensile properties                | Unit | HDPE | PP   | PLA              |
|-----------------------------------|------|------|------|------------------|
| Young's modulus                   | MPa  | 1200 | 1500 | 3500             |
| Stress at yield                   | MPa  | 27   | 34   | 60 <sup>1</sup>  |
| Strain at yield                   | %    | 8    | 9    | 2.4 <sup>1</sup> |
| <b>Impact resistance (+23 °C)</b> |      |      |      |                  |

|                  |                 |   |   |   |
|------------------|-----------------|---|---|---|
| Charpy, notched. | $\text{kJ/m}^2$ | 7 | 3 | 5 |
|------------------|-----------------|---|---|---|

## References

- 1 G. W. de Kort, L. H. C. Bouvrie, S. Rastogi and C. H. R. M. Wilsens. *ACS Sustain. Chem. Eng.*, 2020, **8**, 624–631.
- 2 Acetic acid. <https://webbook.nist.gov/cgi/cbook.cgi?ID=C64197&Type=IR-SPEC&Index=2#IR-SPEC>. (accessed 2 November 2020).
- 3 Oleic Acid. <https://webbook.nist.gov/cgi/cbook.cgi?ID=C112801&Units=SI>. (accessed 2 November 2020).
